# Supplementary material for: Highly stable electrical manipulation of reflective colors in colloidal crystals of sulfate iron oxide particles in organic media
Source: Royal Society of Chemistry journal article supplement (doi:10.1039/c6ra20849e), 2016-01-01
Supplement: c6ra20849e6.pdf [file c6ra20849e6.pdf]

## Electronic Supplementary Information (ESI)

# Highly Stable Electrical Manipulation of Reflective Colors in Colloidal Crystals of Sulfate Iron Oxide Particles in Organic Media

Hye-Young Lee <sup>a,b</sup>, Seung-Hyun Kim<sup>b</sup>, Hae-Nyung Lee,<sup>a,b</sup> Keum Hwan Park,<sup>a</sup> Young-Seok Kim<sup>a,\*</sup>, Gi-Ra Yi<sup>b,\*</sup>

<sup>a</sup>Korea Electronics Technology Institute, Seongnam, Gyeonggi 13509, Republic of Korea

<sup>b</sup>School of Chemical Engineering, Sungkyunkwan University, Suwon, Gyeonggi 16419, Republic of Korea

\*vis4freedom@keti.re.kr, yigira@skku.edu

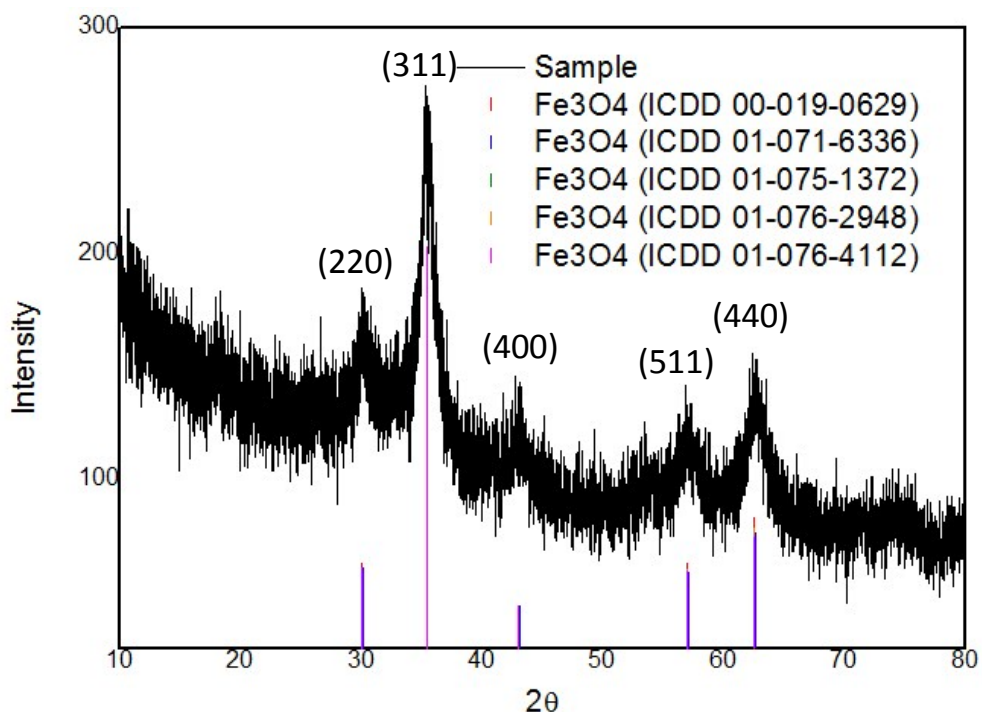

**Figure S1.** X-ray diffraction pattern of carbon-coated iron oxide ( $\text{Fe}_3\text{O}_4$ ) nanoparticles.

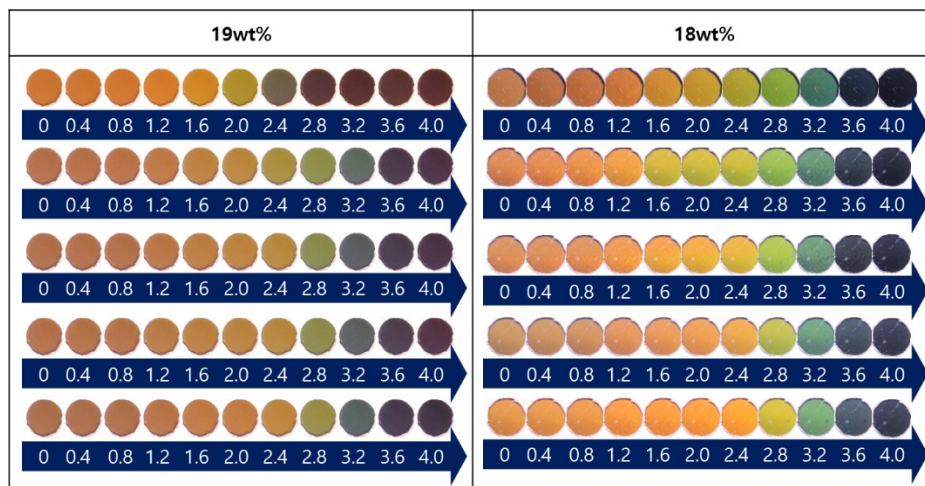

**Figure S2.** Highly concentrated suspension of sulfate iron oxide nanoparticles in propylene carbonate (18, 19 wt%) show reflective colors with shorter wavelengths under same external electric field.

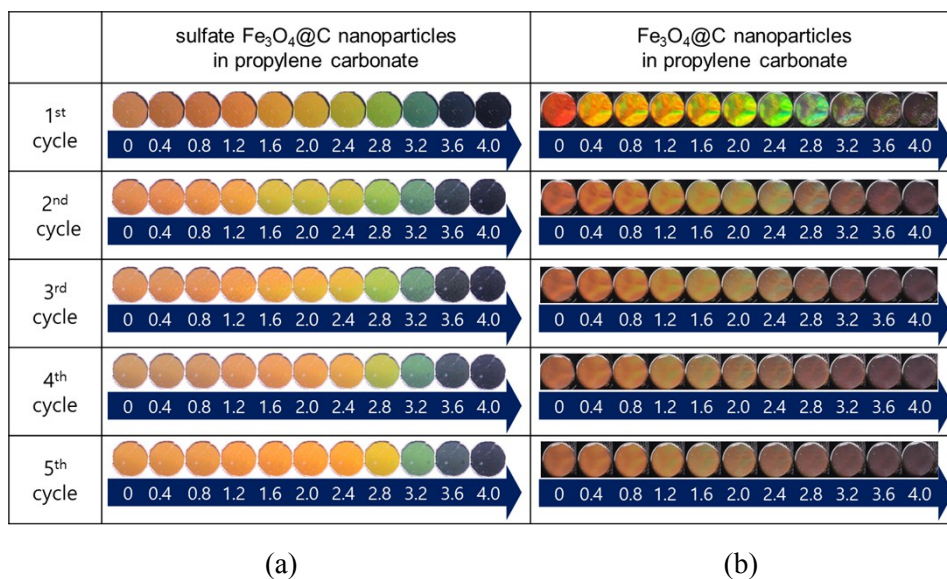

**Figure S3.** The photographic images of reflected color of colloidal crystals of (a) carbon-coated iron oxide nanoparticles and (b) sulfate carbon-coated iron oxide nanoparticles under electric field ranging from 0 to 4V.
